# Supplementary material
Source: PubMed Central journal article supplement (PMC5661673)
Supplement: CPH729835_Appendix.pdf [file CPH729835_Appendix.pdf]

## Appendix 1: Voting frequency for trials ( $N = 23$ )

| Trial                                                                                                                                                                                                                                                                         | N  | %  |
|-------------------------------------------------------------------------------------------------------------------------------------------------------------------------------------------------------------------------------------------------------------------------------|----|----|
| Systolic Blood Pressure Intervention Trial (SPRINT)                                                                                                                                                                                                                           | 21 | 91 |
| Empagliflozin, Cardiovascular Outcomes and Mortality in Type 2 Diabetes (EMPA-REG OUTCOME)                                                                                                                                                                                    | 20 | 86 |
| Improved Reduction of Outcomes: Vytorin Efficacy International Trial (IMPROVE-IT)                                                                                                                                                                                             | 12 | 52 |
| Prospective Randomized Evaluation of Celecoxib Integrated Safety versus Ibuprofen or Naproxen (PRECISION)                                                                                                                                                                     | 11 | 48 |
| Liraglutide Effect and Action in Diabetes: Evaluation of Cardiovascular Outcome Results (LEADER)                                                                                                                                                                              | 9  | 39 |
| Alberta Vascular Risk Reduction Community Pharmacy Project (Rx EACH)                                                                                                                                                                                                          | 6  | 26 |
| Bridging Anticoagulation in Patients who Require Temporary Interruption of Warfarin Therapy for an Elective Invasive Procedure or Surgery (BRIDGE)                                                                                                                            | 5  | 22 |
| Heart Outcomes Prevention Evaluation (HOPE)-3                                                                                                                                                                                                                                 | 4  | 17 |
| Trial Evaluating Cardiovascular Outcomes with Sitagliptin (TECOS)                                                                                                                                                                                                             | 3  | 13 |
| Intracoronary Stenting and Antithrombotic Regimen—Testing of a 6-Week Versus a 6-Month Clopidogrel Treatment Regimen in Patients With Concomitant Aspirin and Oral Anticoagulant Therapy Following Drug-Eluting Stenting (ISAR-TRIPLE)                                        | 3  | 13 |
| Reversal Effects of Idarucizumab on Active Dabigatran (RE-VERSE AD)                                                                                                                                                                                                           | 3  | 13 |
| Prevention of Cardiovascular Events in Patients with Prior Heart Attack Using Ticagrelor Compared to Placebo on a Background of Aspirin-Thrombolysis in Myocardial Infarction 54 (PEGASUS-TIMI 54)                                                                            | 2  | 9  |
| Rate Control versus Rhythm Control for Atrial Fibrillation after Cardiac Surgery                                                                                                                                                                                              | 2  | 9  |
| Evaluation of Lixisenatide in Acute Coronary Syndrome (ELIXA)                                                                                                                                                                                                                 | 1  | 4  |
| Open-Label, Randomized, Controlled, Multicenter Study Exploring Two Treatment Strategies of Rivaroxaban and a Dose-Adjusted Oral Vitamin K Antagonist Treatment Strategy in Subjects with Atrial Fibrillation who Undergo Percutaneous Coronary Intervention (PIONEER AF-PCI) | 1  | 4  |
| Evaluation of Varenicline in Smoking Cessation for Patients Post-Acute Coronary Syndrome (EVITA)                                                                                                                                                                              | 1  | 4  |
| Trial to Evaluate Cardiovascular and Other Long-term Outcomes with Semaglutide in Subjects with Type 2 Diabetes (SUSTAIN-6)                                                                                                                                                   | 0  | 0  |
| Long-term Safety and Tolerability of Alirocumab in High Cardiovascular Risk Patients with Hypercholesterolemia Not Adequately Controlled with Their Lipid Modifying Therapy (ODYSSEY LONG TERM)                                                                               | 0  | 0  |
| Andexanet Alfa, a Novel Antidote to the Anticoagulation Effects of FXA Inhibitors (ANNEXA-4)                                                                                                                                                                                  | 0  | 0  |

Appendix to: Barry AR, Babadagli HE, Basaraba JE, et al. Review of the top 5 cardiology studies of 2015-16. *Can Pharm J (Ott)* 2017;150(6). DOI: 10.1177/1715163517729835.
